# Supplementary material
Source: PubMed Central journal article supplement (PMC9008056)
Supplement: 41419_2022_4809_MOESM1_ESM.pdf [file 41419_2022_4809_MOESM1_ESM.pdf]

*Supplemental Figures*

**Generation of resolving memory neutrophils through pharmacological training with 4-PBA or genetic deletion of TRAM**

RuiCi Lin<sup>1</sup>, Ziyue Yi<sup>1,2</sup>, Jing Wang<sup>1</sup>, Shuo Geng<sup>1</sup>, Liwu Li<sup>1,2</sup>

<sup>1</sup>Department of Biological Sciences, Virginia Tech, Blacksburg, VA24061; <sup>2</sup>Graduate Program of Genetics, Biotechnology and Computational Biology, Virginia Tech, Blacksburg, VA24061

Running Title: Generation of resolving neutrophil memory

Keywords: Neutrophil memory, Inflammation resolution, CD200R, TRAM, 4-PBA

\*Correspondence:

Liwu Li, Ph.D

970 Washington Street, Virginia Tech, Blacksburg, VA 24061-0910 Email: [lwli@vt.edu](mailto:lwli@vt.edu)

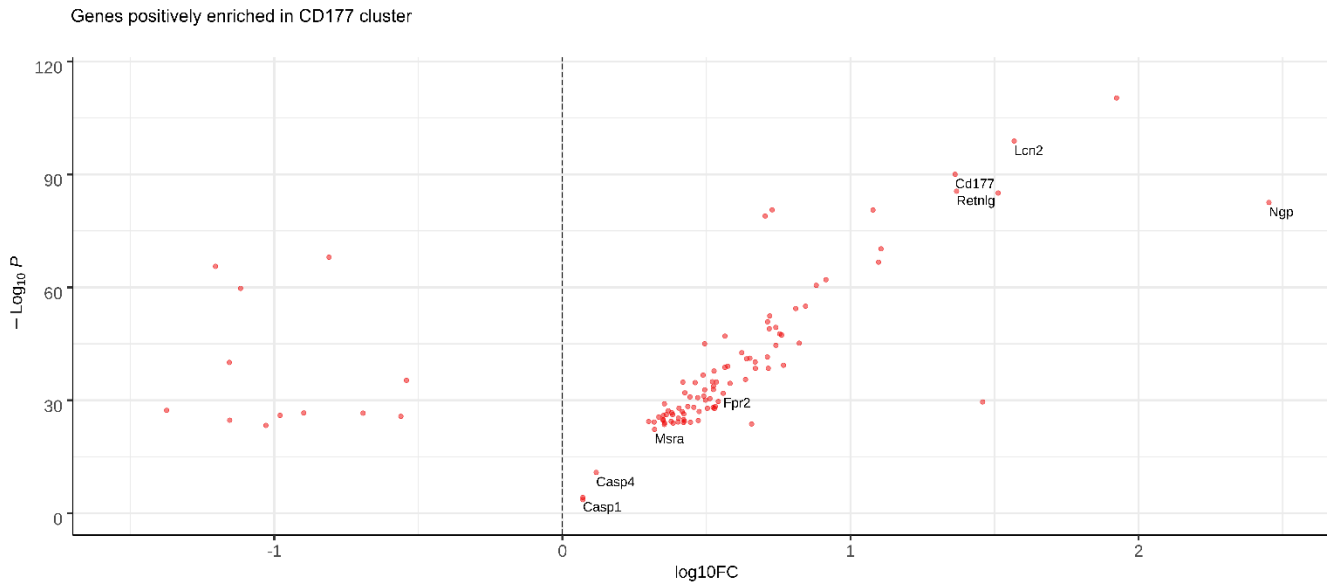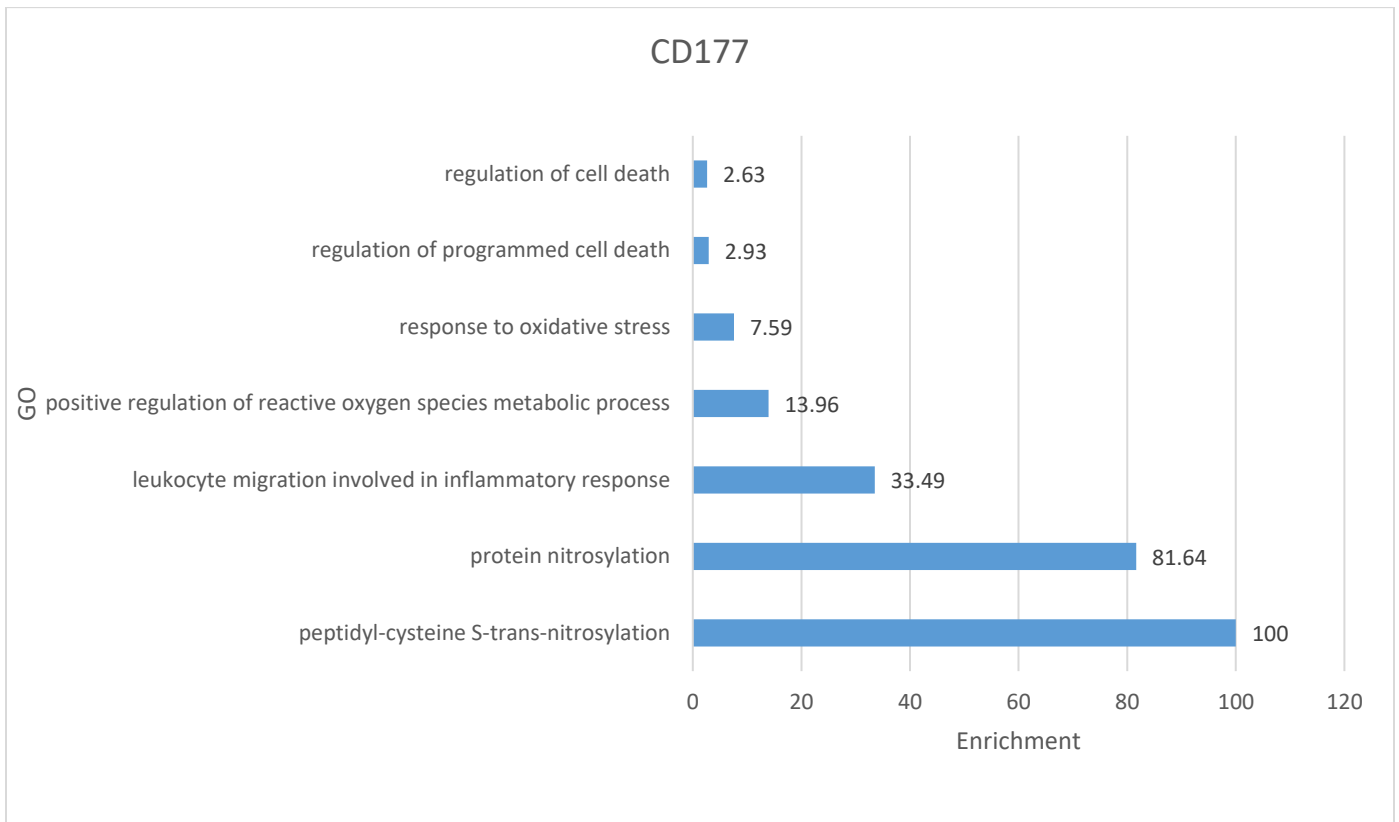

**Supplementary Figure S1A. Differential gene expression profiles in the CD177 neutrophil cluster.** *Upper panel:* Volcano plot demonstrating up-regulated genes in the CD177 neutrophil cluster (fold changes in x axis; Mann-Whitney p value in y axis). *Lower panel:* Enrichment analyses of GO biological process categories of significantly upregulated genes in CD177 neutrophil cluster.

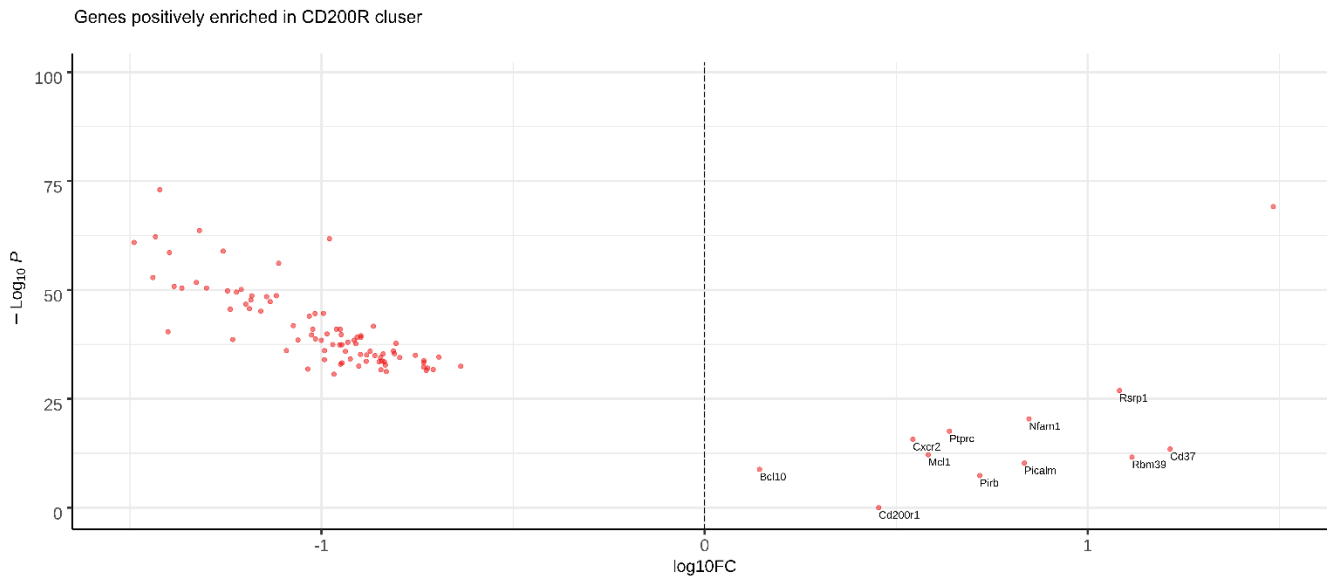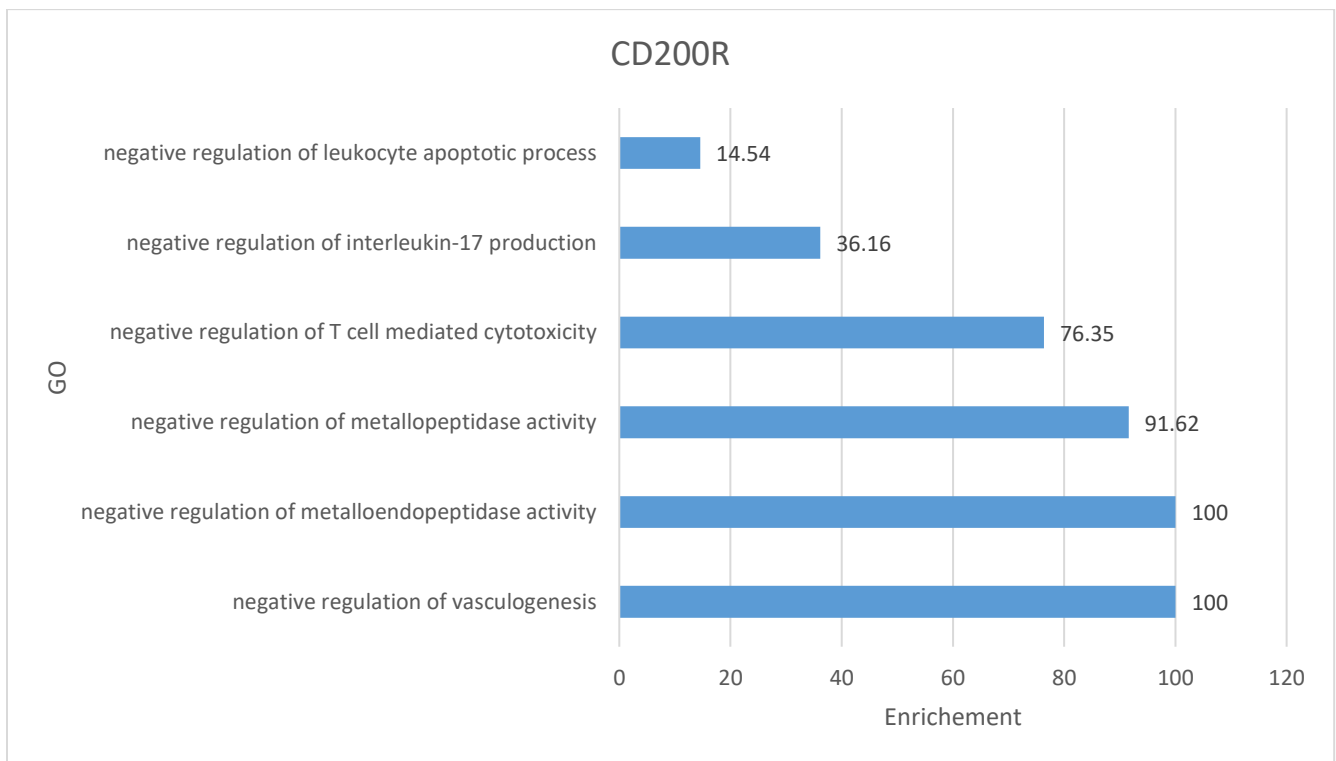

**Supplementary Figure S1B. Differential gene expression profiles in the CD200R neutrophil cluster.** *Upper panel:* Volcano plot demonstrating up-regulated genes in the CD200R neutrophil cluster (fold changes in x axis; Mann-Whitney p value in y axis). *Lower panel:* Enrichment analyses of GO biological process categories of significantly upregulated genes in CD200R neutrophil cluster.

Genes positively enriched in the Intermediate cluster

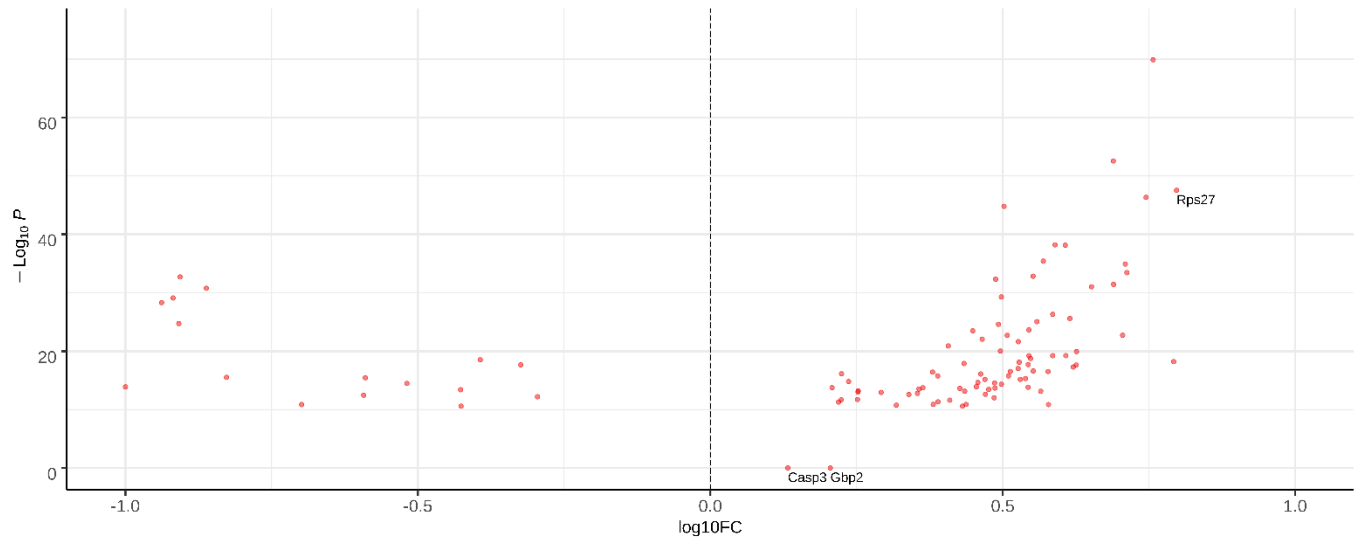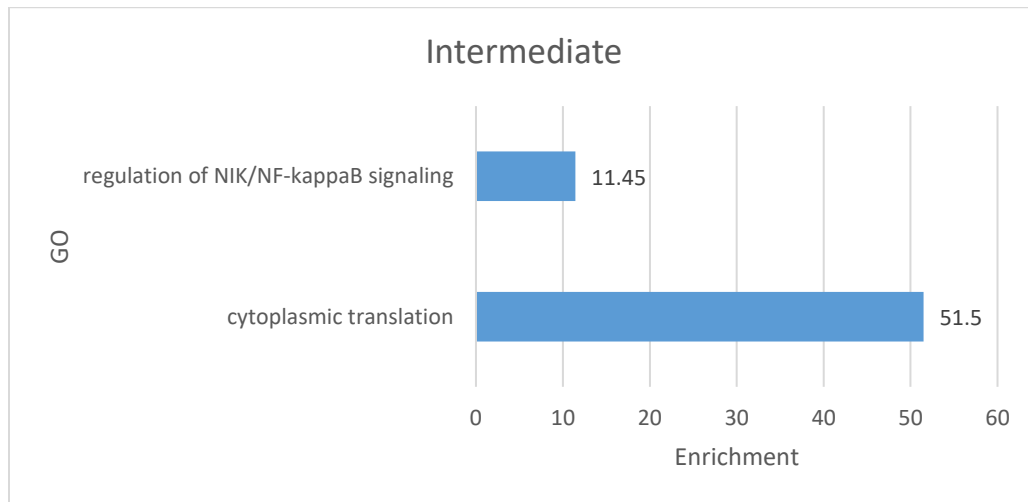

**Supplementary Figure S1C. Differential gene expression profiles in the intermediate neutrophil cluster.** *Upper panel:* Volcano plot demonstrating up-regulated genes in the intermediate neutrophil cluster (fold changes in x axis; Mann-Whitney p value in y axis). *Lower panel:* Enrichment analyses of GO biological process categories of significantly upregulated genes in intermediate neutrophil cluster.

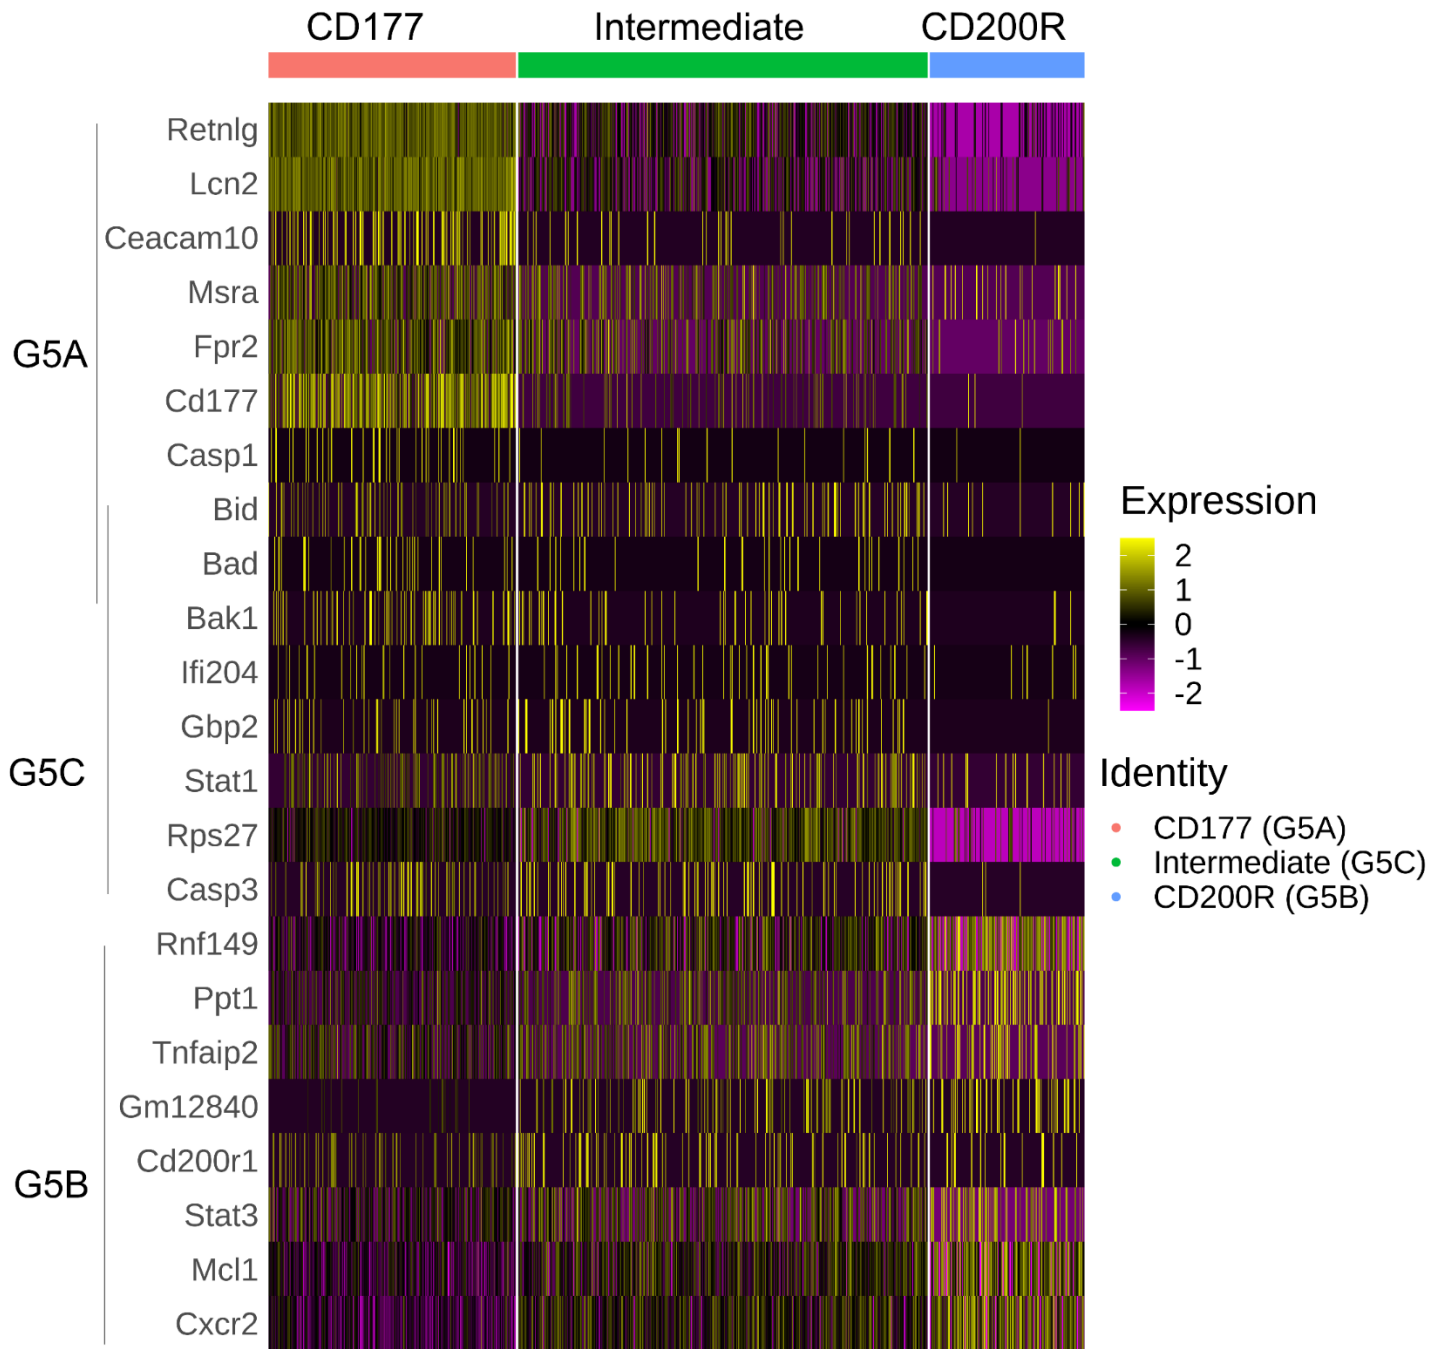

**Supplementary Figure S1D. Comparative analyses of three neutrophil clusters.** Signature genes enriched in three neutrophil clusters (5a, 5b, 5c) by an independent study (Xie et al, 2020, Nature Immunology, 21:1119-1133) correlated with the three clusters defined in this report, with the 5a cluster representing the CD177 population; 5c cluster correlating with the intermediate population; 5b relating to CD200R population.

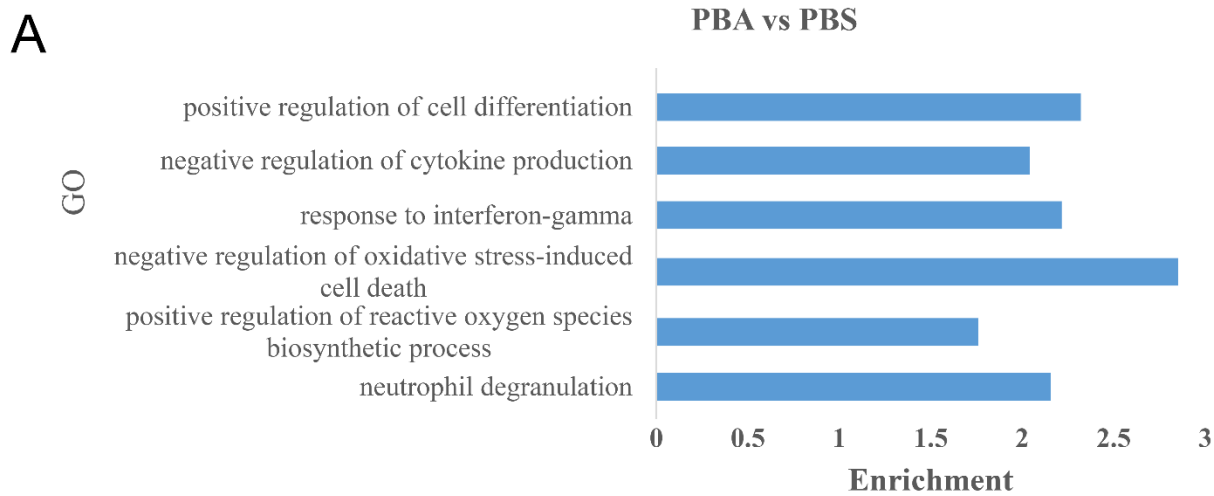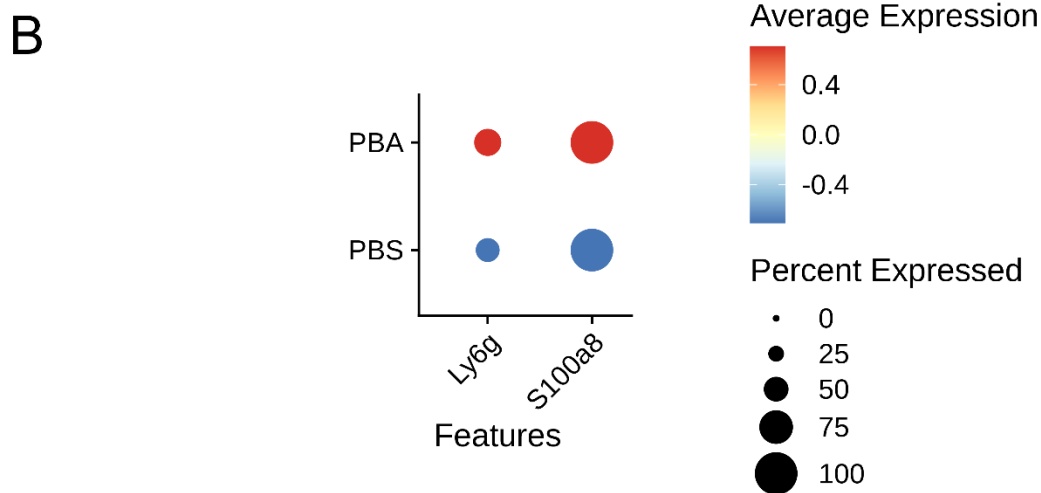

**Supplementary Figure S2. GO analyses of scRNAseq data from 4-PBA vs PBS programmed neutrophils.**

**A** Enrichment analyses of GO biological process categories representing significantly altered genes comparing 4-PBA vs PBS trained neutrophils.

**B** Bubble plot analyses of key neutrophil maturation genes Ly6G and S100A8 comparing PBS and 4-PBA trained neutrophils.

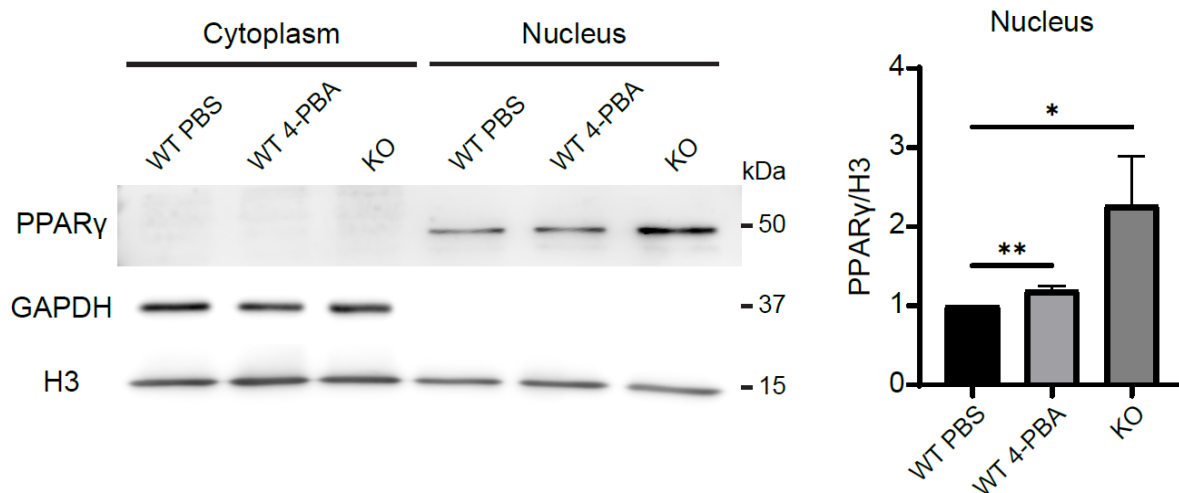

**Supplementary Figure S3. Nuclear and cytoplasmic levels of PPAR $\gamma$ .**

(Left panel): Western blot analyses of PPAR $\gamma$ , GAPDH, and H3 levels from the cytosolic or nuclear fractions of neutrophils treated as specified. (Right panel): Quantification data from three experiments. Data were plotted as mean  $\pm$  SD. \*\*P < 0.01, \*P < 0.05 using one-way ANOVA test followed by the post-hoc Sidak multiple comparisons test.

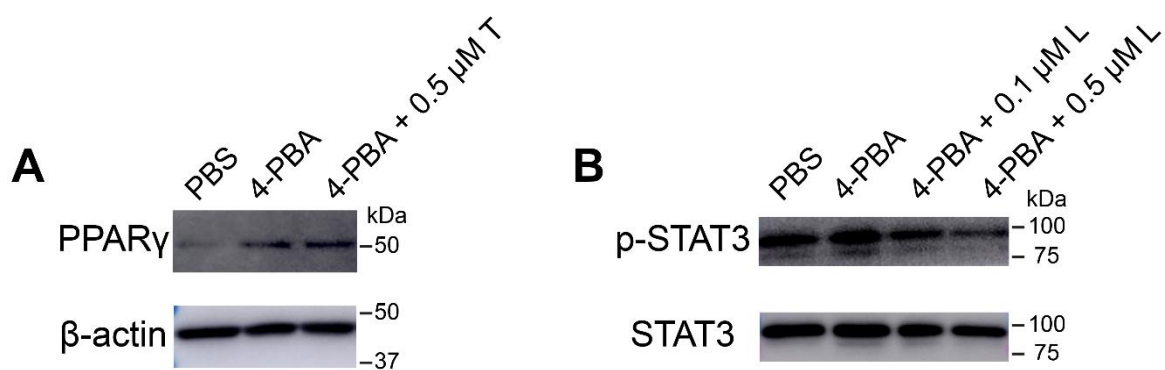

**Supplementary Fig. S4 Inhibition of PPAR $\gamma$  or STAT3 by selective inhibitors.**

**A** Western blot of PPAR $\gamma$  and  $\beta$ -actin on WT neutrophils treated with PBS, 4-PBA (1 mM; 24 hours), or pre-treated with T0070907 (0.5  $\mu$ M) for 2 hours followed by 4-PBA (1 mM) stimulation for 24 hours.

**B** Western blot of p-STAT3 and STAT3 of WT neutrophils treated with PBS, 4-PBA (1 mM; 24 hours), or pre-treated with LLL12 (0.1 or 0.5  $\mu$ M) for 2 hours followed by 4-PBA (1 mM) stimulation for 24 hours.

Data are representative of at least three independent experiments. 4, 4-PBA; T, T0070907; L, LLL12.



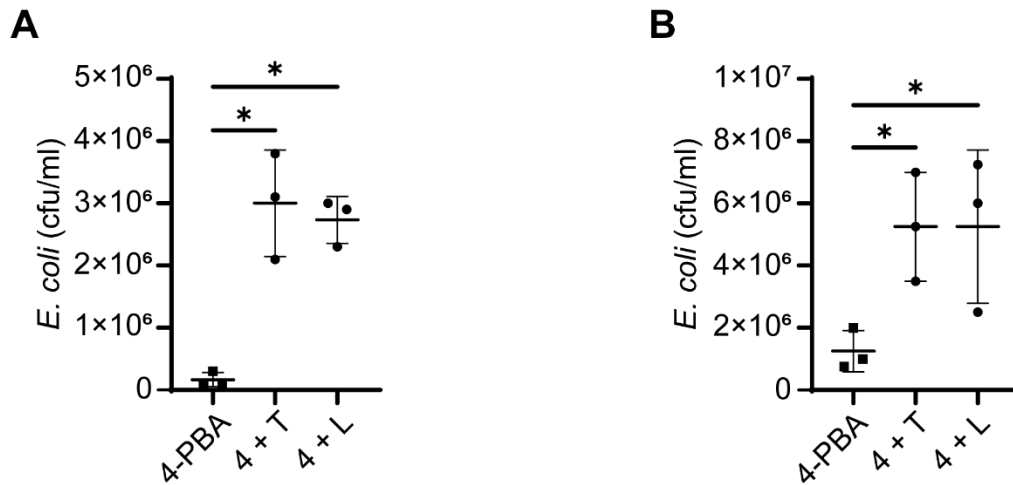

**Supplementary Fig. S5 Inhibition of PPAR $\gamma$  or STAT3 reduces bacterial killing abilities of resolving neutrophils trained by 4-PBA.**

**A** Analyses of bacterial killing through plating of viable *E. coli* harvested from lysed neutrophils. WT neutrophils pre-treated without or with T0070907 (0.5  $\mu$ M) or LLL12 (0.5  $\mu$ M) for 2 hours followed by 4-PBA (1 mM) stimulation for 24 hours. Neutrophils were subsequently co-incubated with GFP-labeled *E. coli* for 30 minutes. Following washing, neutrophils were lysed and plated on bacterial culture plates. The numbers of viable *E. coli* were counted and the CFU (colony forming units) were plotted (n = 3).

**B** Analyses of bacterial killing through plating of viable *E. coli* collected from culture supernatants. WT neutrophils pre-treated without or with T0070907 (0.5  $\mu$ M) or LLL12 (0.5  $\mu$ M) for 2 hours followed by 4-PBA (1 mM) stimulation for 24 hours. Neutrophils were subsequently co-incubated with GFP-labeled *E. coli* for 30 minutes. Culture supernatants containing extracellular viable bacteria were plated and counted (n = 3). Data were plotted as mean  $\pm$  SD. \*P<0.05 using one-way ANOVA test followed by the post-hoc Sidak multiple comparisons test. 4, 4-PBA; T, T0070907; L, LLL12.

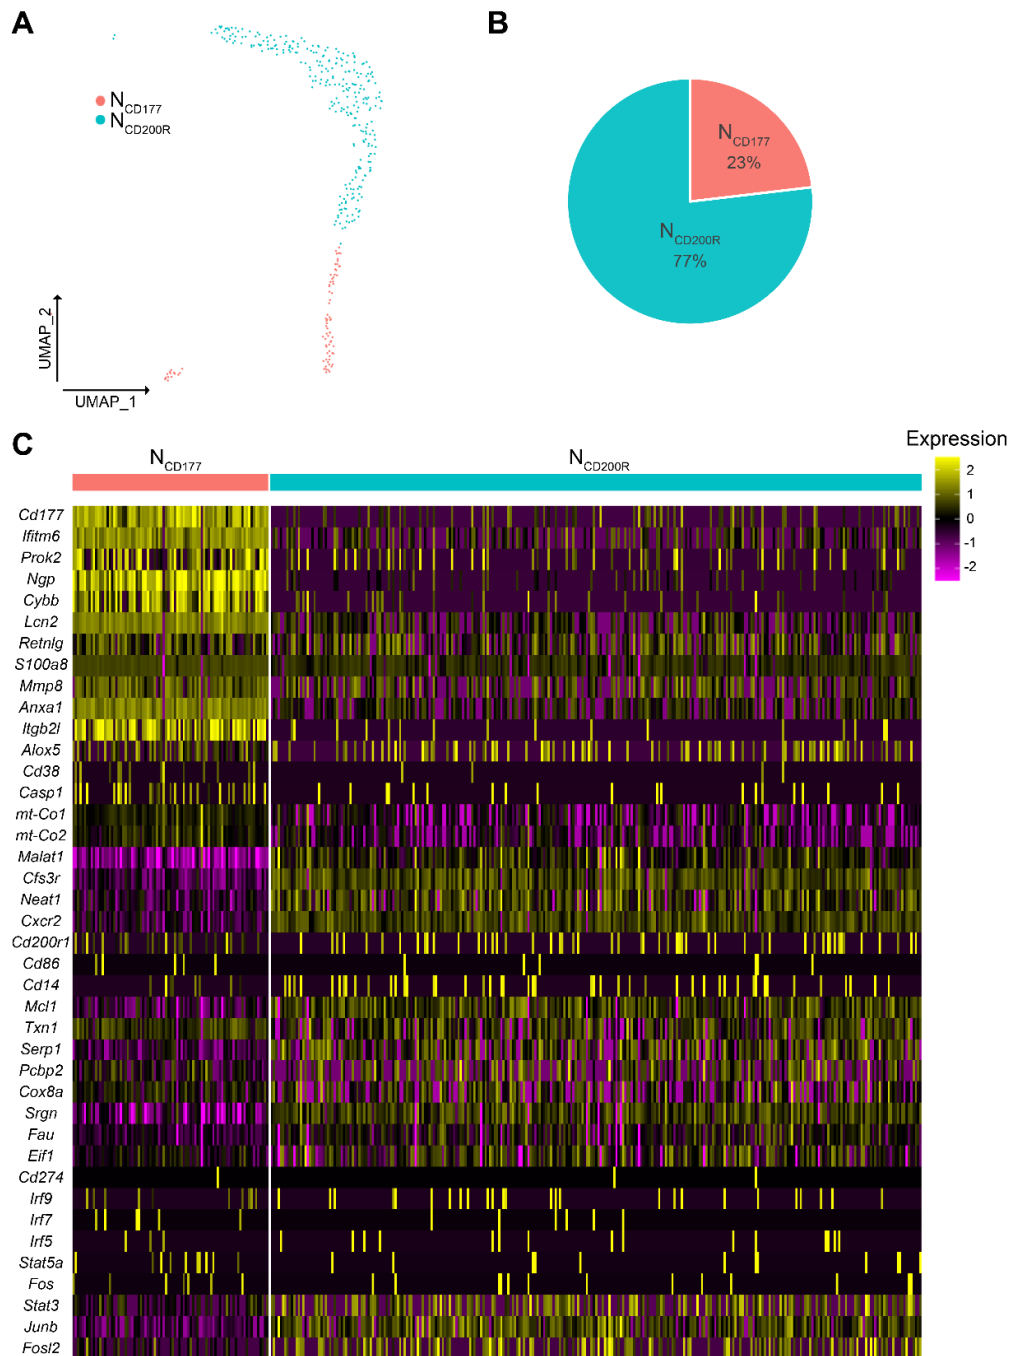

**Supplementary Figure S6. scRNAseq analysis of TRAM-deficient BM neutrophils.**

**A** The UMAP diagram of two TRAM-deficient BM neutrophil subsets ( $N_{CD177}$  and  $N_{CD200R}$ ).

**B** Relative percentages of two neutrophil subsets collected from TRAM-deficient mice bone marrow.

**C** The heatmap of representative genes enriched in two subsets of TRAM-deficient BM neutrophils.

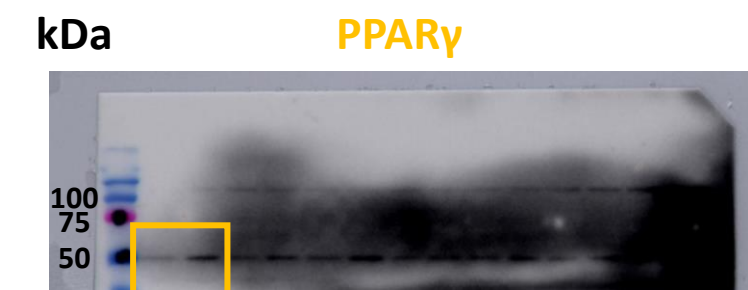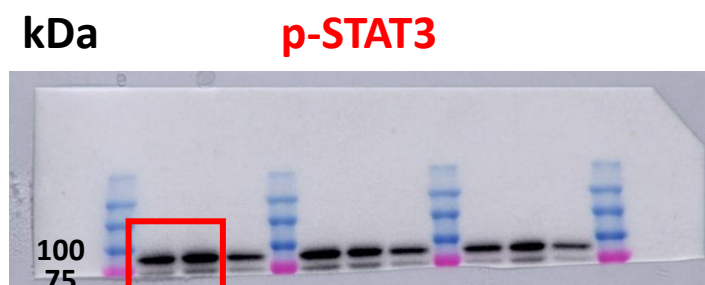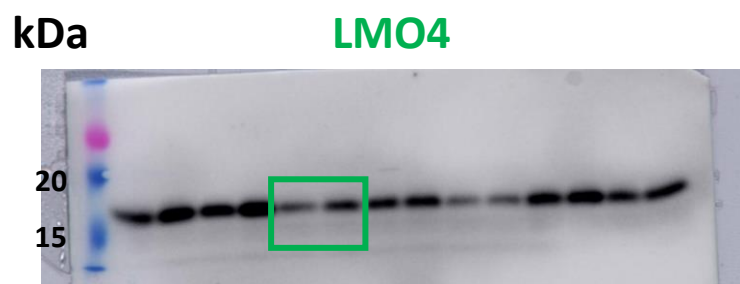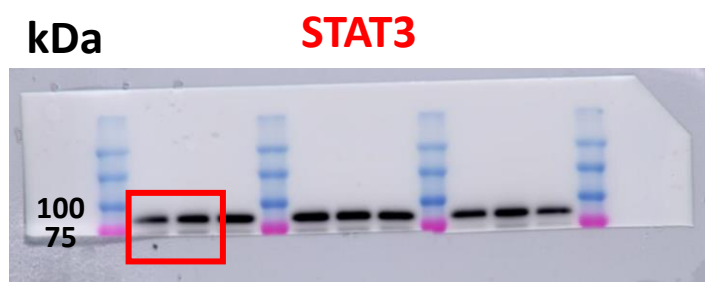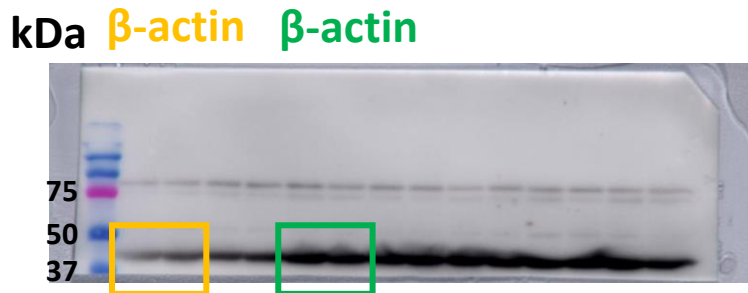

Supplementary Figure S7A. Unprocessed gels for Figure 4.

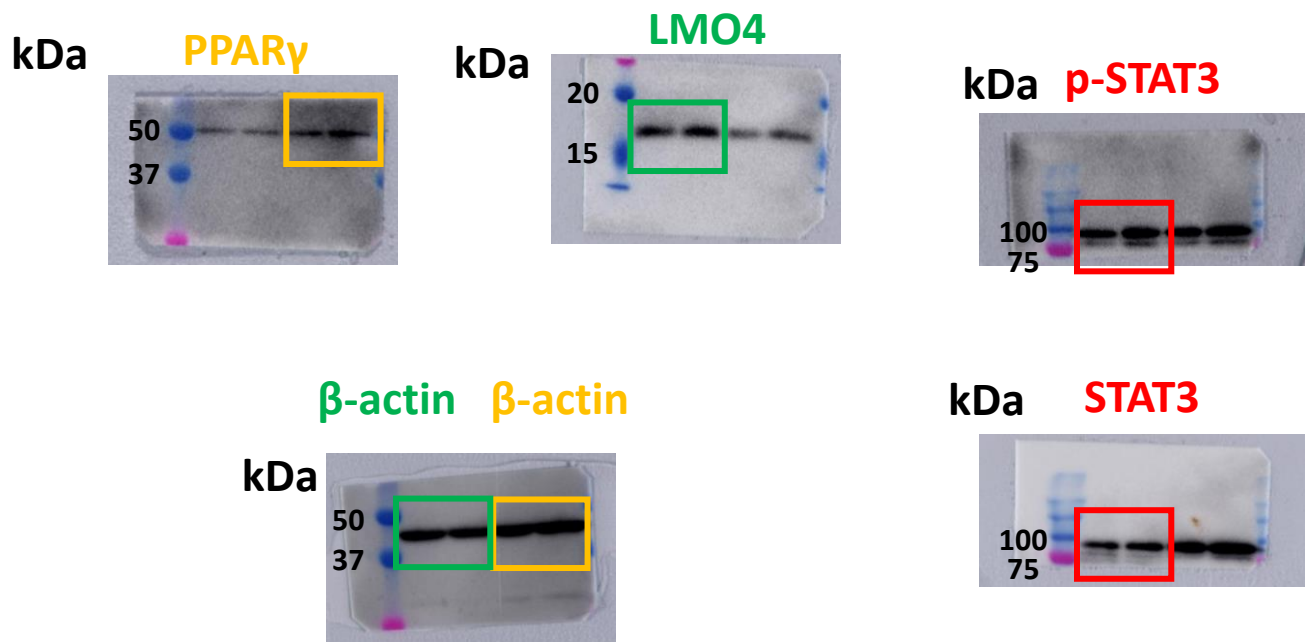

Supplementary Figure S7B. Unprocessed gels for Figure 6.

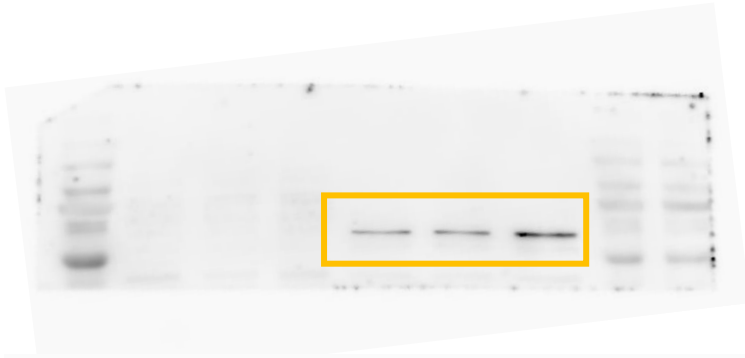

**PPAR $\gamma$**

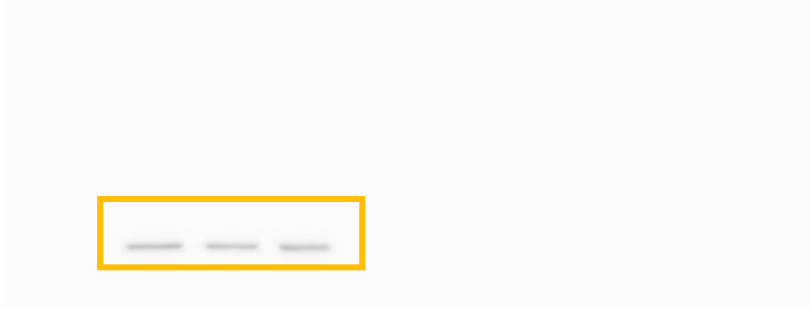

**GAPDH**

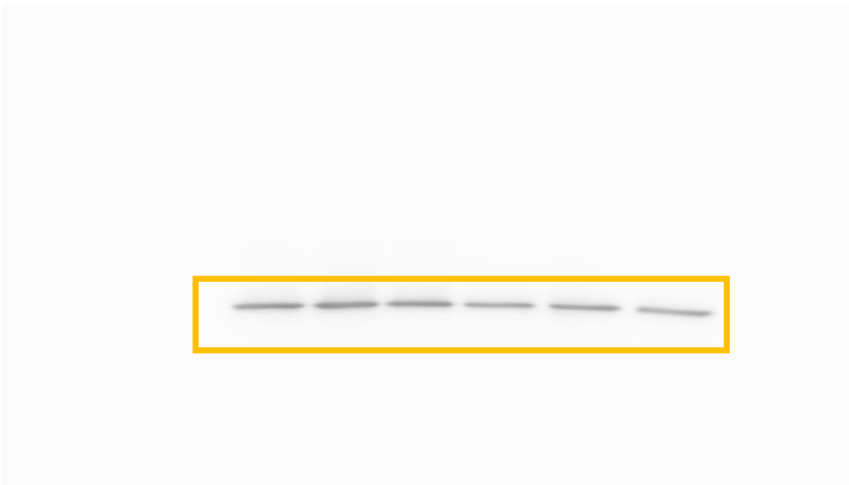

**H3**

**Supplementary Figure S7C. Unprocessed gels for Figure S3.**

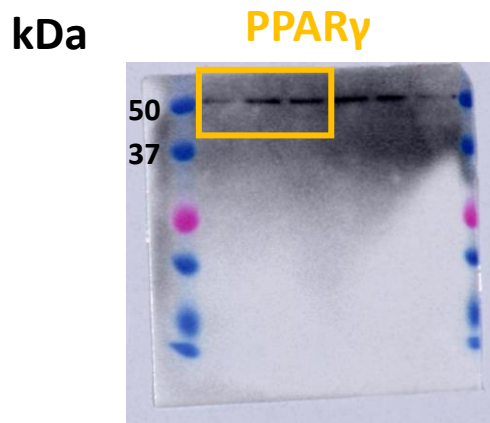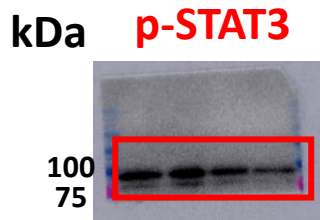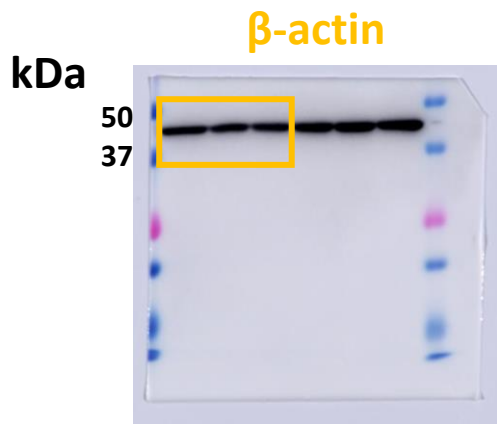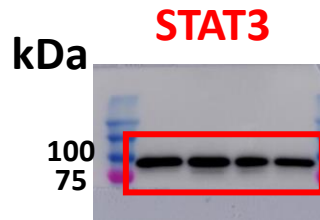

**Supplementary Figure S7D. Unprocessed gels for Figure S4.**
